# Supplementary material for: Co-ordination and divergence of cell-specific transcription and translation of genes in arabidopsis root cells
Source: PubMed Central journal article supplement (PMC4195562; doi:10.1093/aob/mcu151), 2014-08-22
Supplement: supp_mcu151_mcu151supp.pdf [file supp_mcu151_mcu151supp.pdf]

## SUPPLEMENTARY DATA

### FIGURE CAPTIONS

**Figure S1: Normalization of the CEL files.** RMA normalization of the CEL files from the transcriptome and translome was done together. The transcriptome dataset has 19 promoters in total with replicates (53 CEL files in total) which are shown in grey and the translome dataset has 10 promoters with replicates (22 CEL files in total) coloured in red

**Figure S2: Histogram displaying the effects of joint (blue) and individual (pink) RMA normalization of the raw data (CEL files) from transcriptome and translome.** The frequency of gene-expression values does not differ strongly in both scenarios.

**Figure S3: Correlation between the replicates.** (A) The plot shows the correlation between the replicates of the promoters targeting transcriptome cell-types. (B) This shows the correlation between the replicates of the promoters targeting translome cell-types. Also, the number of replicates differs considerably in case of both datasets.

**Figure S4A: Degree distribution of the co-expression and co-translation network.** This figure displays the distribution of the degree for the co-expression (left) and co-translation network (right) using the 4 identical promoters. Clearly, the difference of both network-topologies becomes visible. However, the degree of the 12 genes (indicated by small *red* bars at the x-axis) is not strongly confined to a particular range, i.e. low degree or high degree.

**Figure S4B: Edge betweenness of the co-expression and co-translation network.** This figure displays the distribution of the betweenness for the co-expression (left) and co-translation network (right) using the 4 identical promoters. In this case, both network-structures seem more similar, but again, the betweenness of the 12 genes (indicated by small *red* bars at the x-axis) is evenly spaced across the whole range of obtained betweenness values. Note, that similar observation hold true both for other network properties as well as for the common set of promoters.

**Figure S5A: Relative gene expression levels for the 890 DEG with significant differences across identical promoters in transcriptome (left) and translome (right).** The identical promoters are shown on the x-axes and the common DE genes along the y-axes. Common DE genes show divergent patterns of cell specificity across the two system levels.

**Figure S5B: Relative gene expression levels for the 3922 genes with significant differences across common promoters in transcriptome (left) and translome (right).** The common

promoters are shown on the x-axes and the common DE genes along the y-axes. Common DE genes show divergent patterns of cell specificity across the transcriptome and translome.

**Figure S6: Conversion of pairwise differences in cell-type-specific expression levels derived by Tukey's HSD test, to cell-type similarity networks.** Gene 1 is overexpressed in phloem companion cells (SUC2), rendering this cell-type different from the remaining 3 cell-types (represented by no edge). In case of gene 2, there exists no significant difference in cell-type-specific expression levels. As a result, all cell-types are similar, further represented by edges being present.

**Figure S7: All possible motif occurrences across the identical promoter data of the transcriptome and translome.** Out of all possible network motifs for the transcriptome and translome, only nine for the transcriptome and five for the translome occur more often than expected by chance. The "C" and "L" used in the figure indicate the transcriptome and translome respectively and give the number of genes which coincide with each motif.

Figure S1

**Pre-normalization**

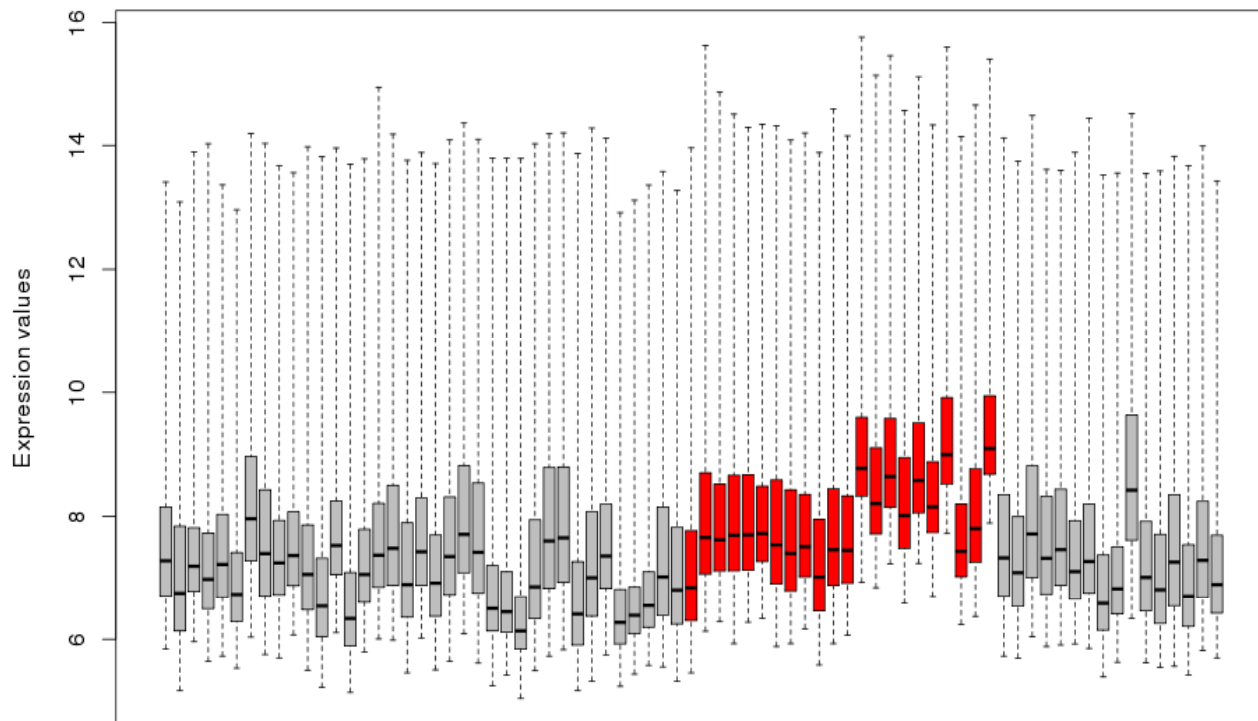

Transcriptome and Translatome data CEL files

**Post-normalization**

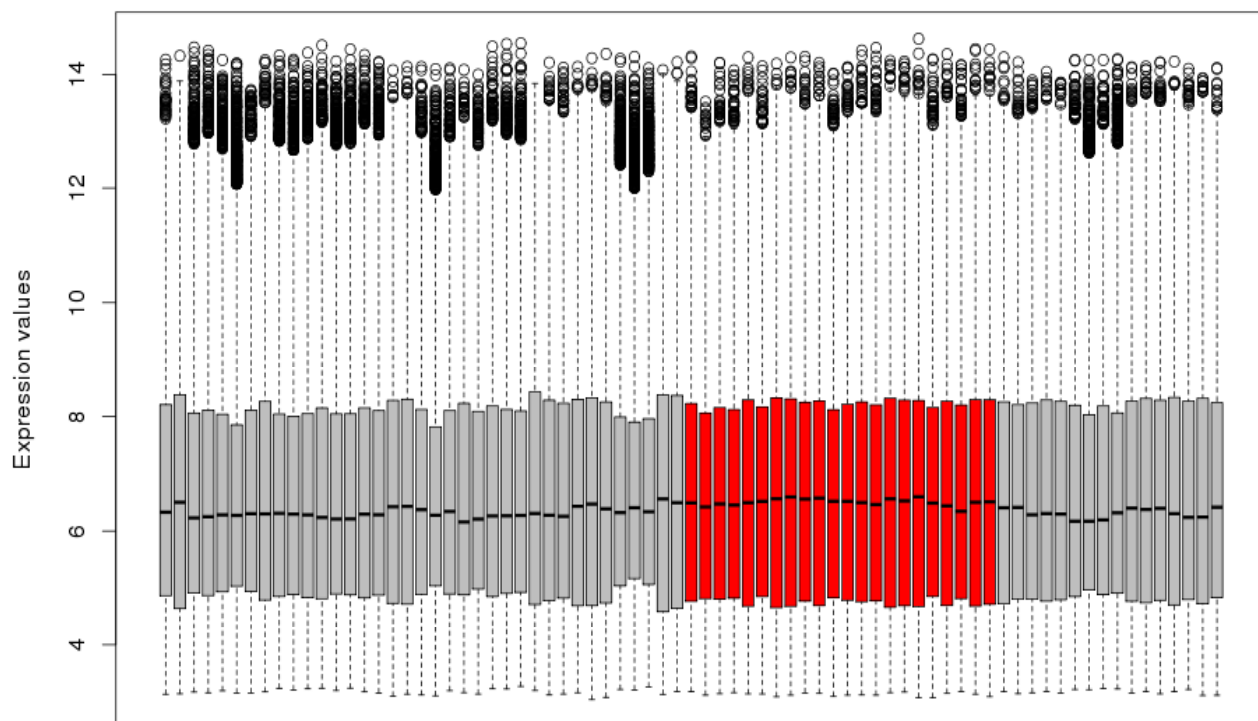

Transcriptome and Translatome data CEL files

Figure S2

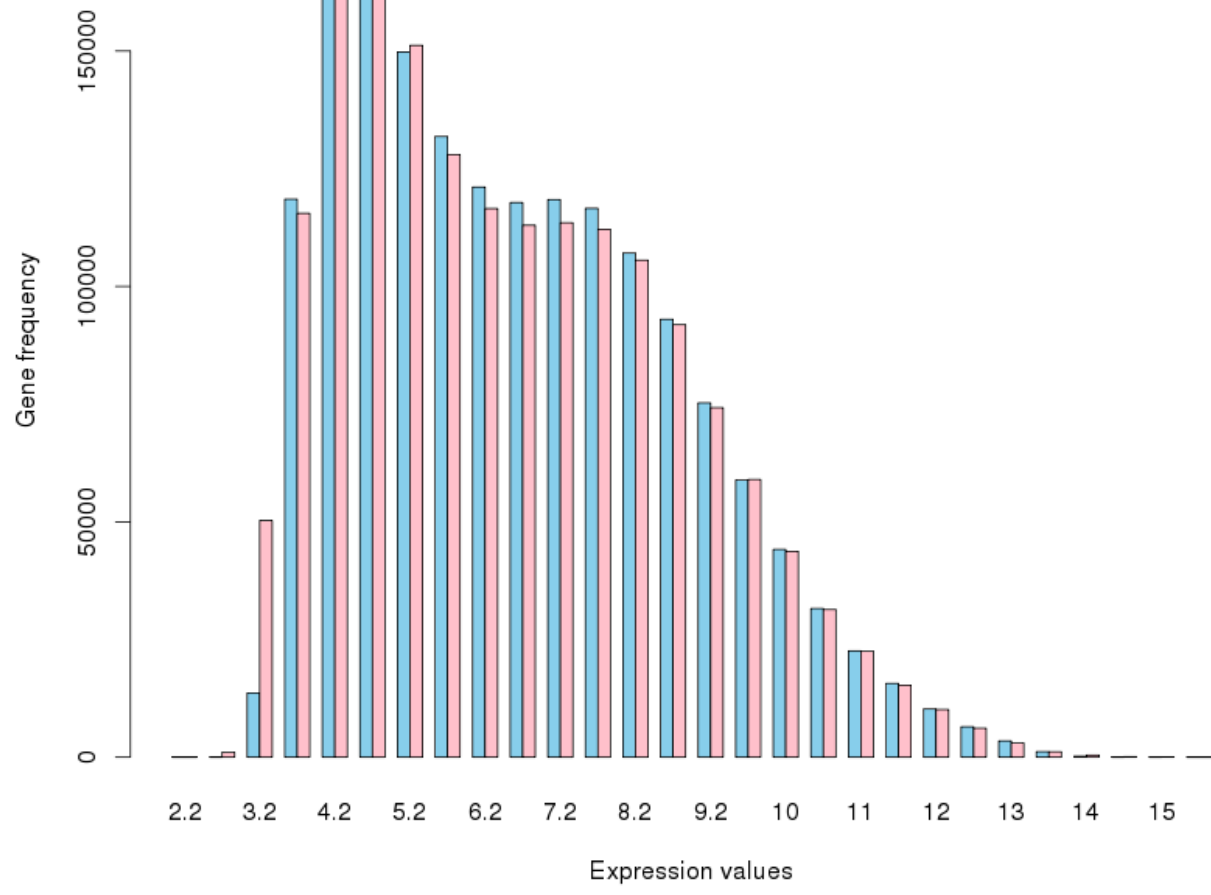

Figure S3

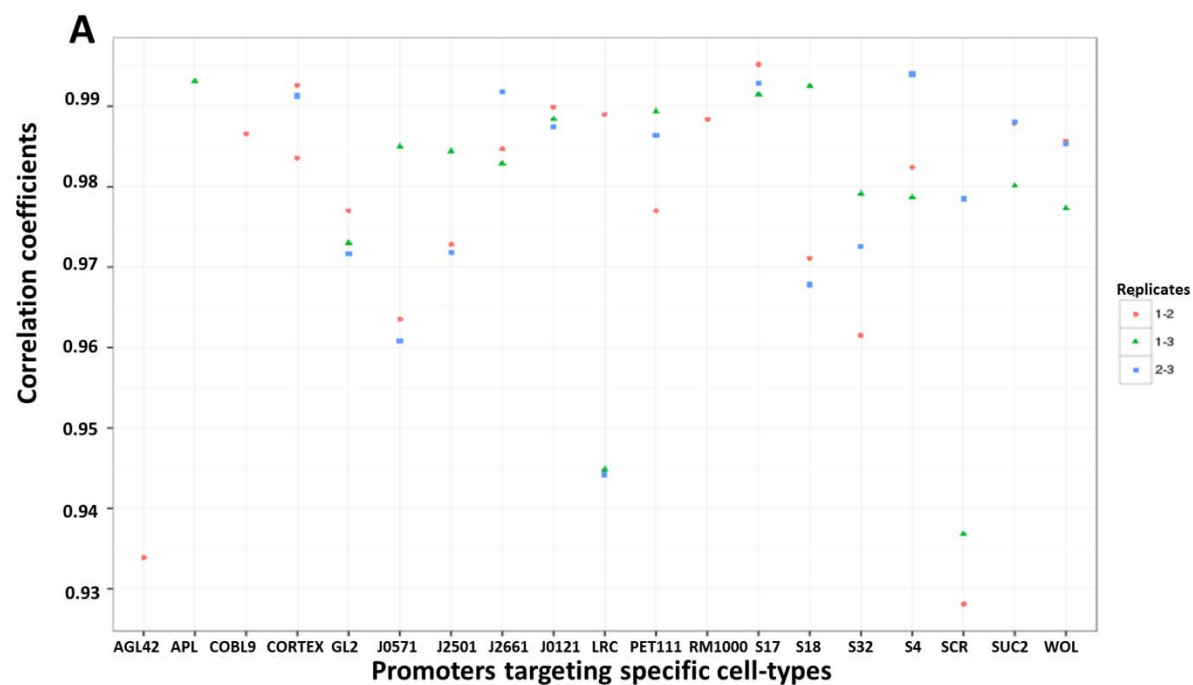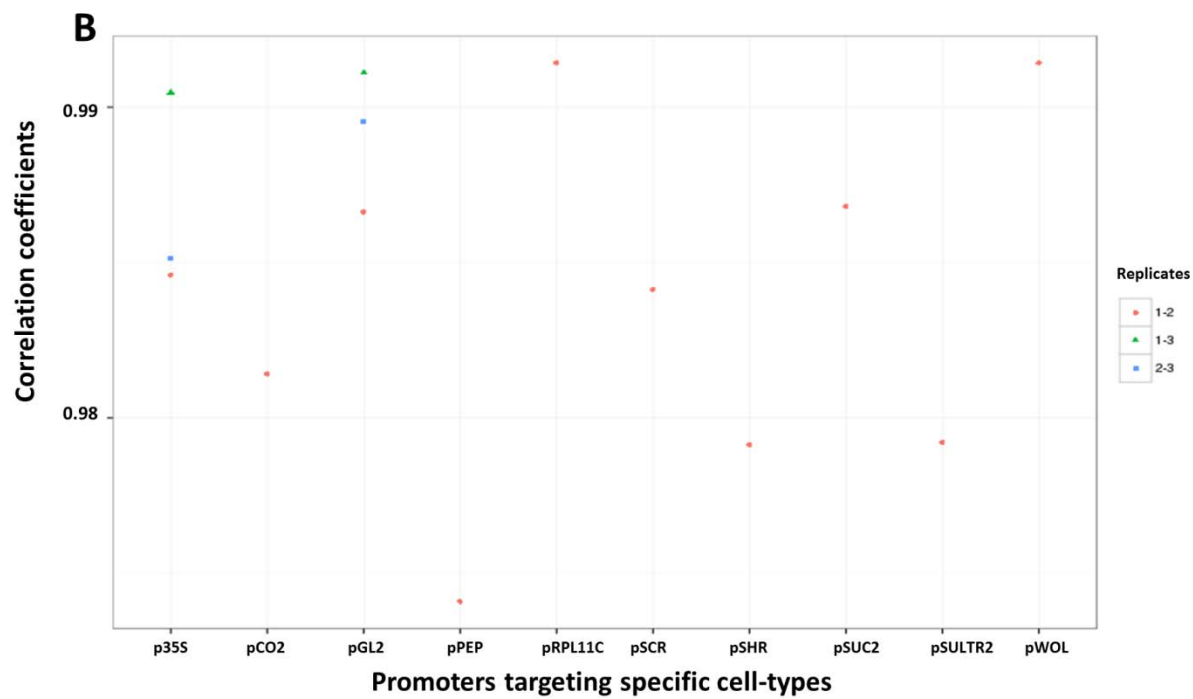

Figure S4A

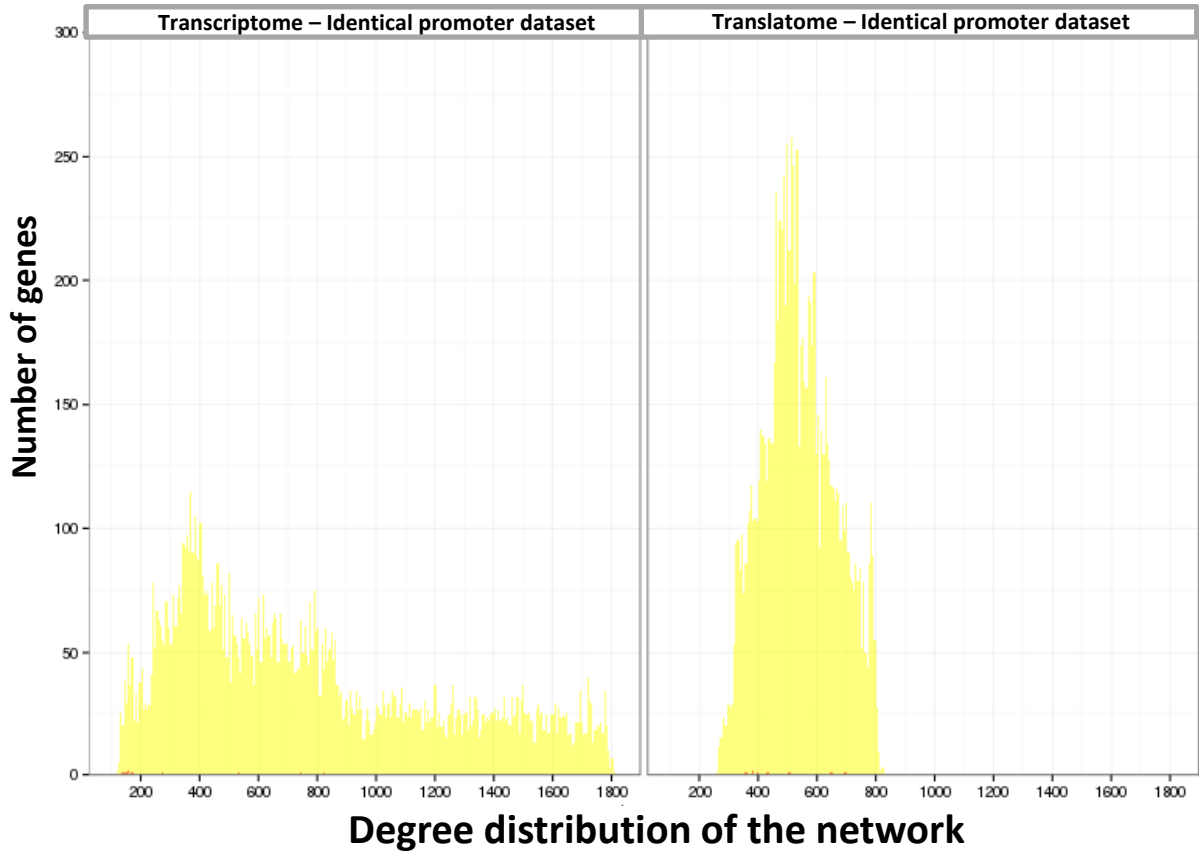

Figure S4B

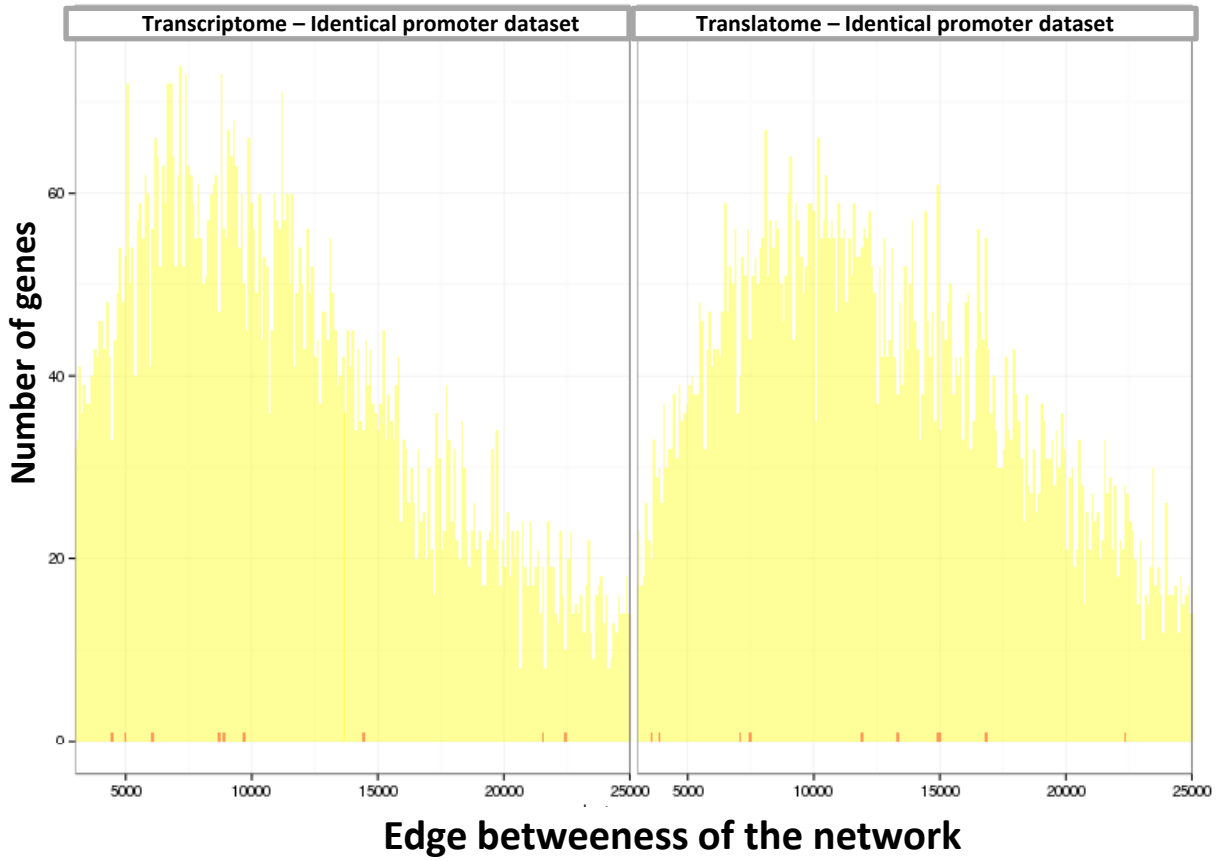

Figure S5A

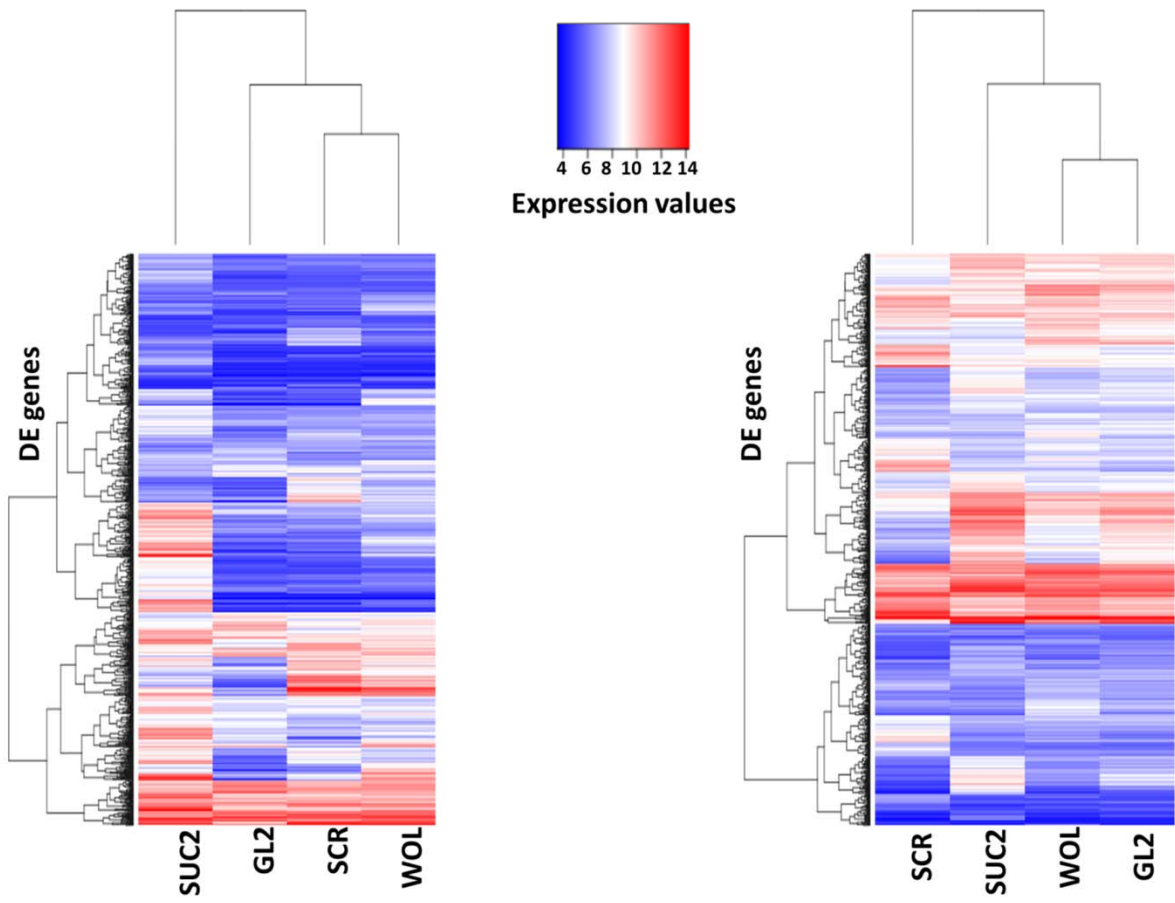

Figure S5B

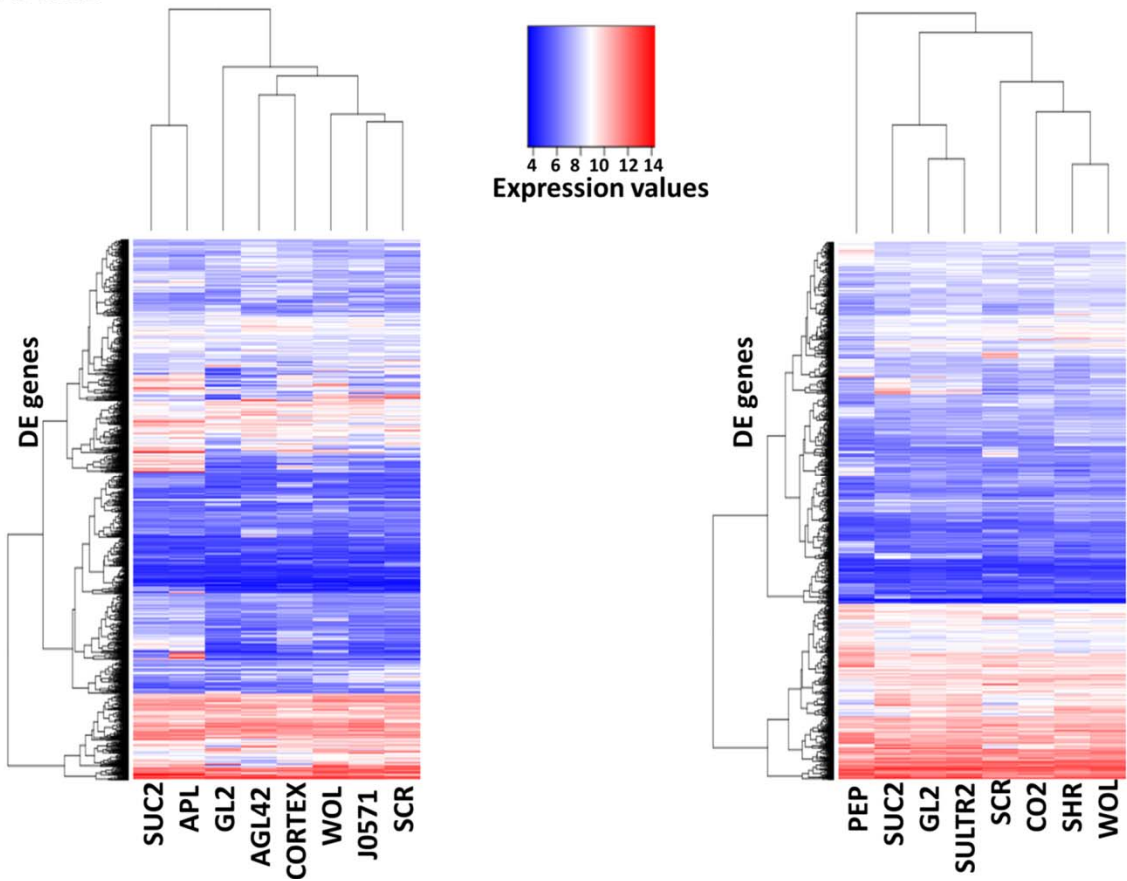

Figure S6

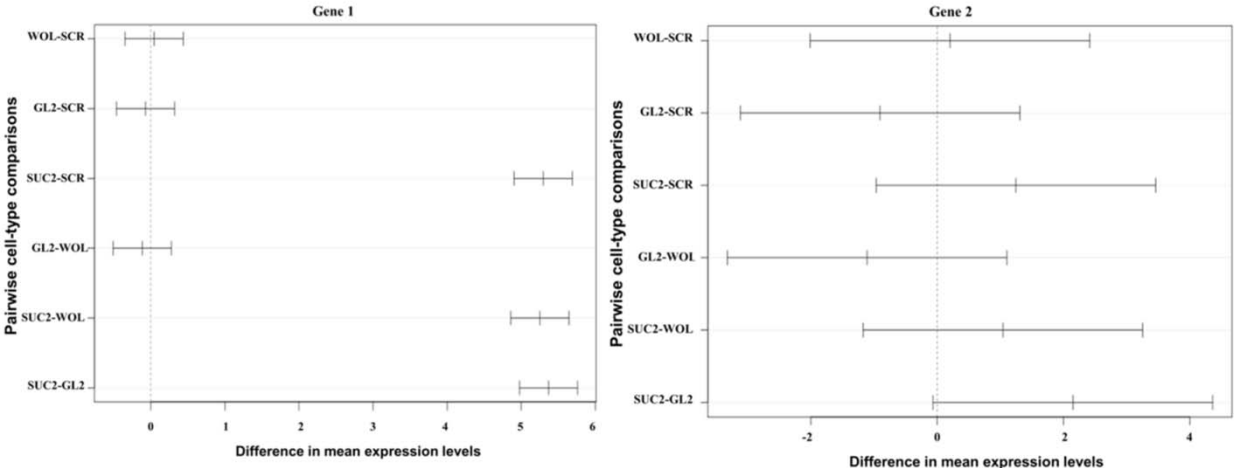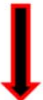

|               | <b>WOL-SCR</b> | <b>GL2-SCR</b> | <b>SUC2-SCR</b> | <b>GL2-WOL</b> | <b>SUC2-WOL</b> | <b>SUC2-GL2</b> |
|---------------|----------------|----------------|-----------------|----------------|-----------------|-----------------|
| <b>Gene 1</b> | 0              | 0              | 1               | 0              | 1               | 1               |
| <b>Gene 2</b> | 0              | 0              | 0               | 0              | 0               | 0               |

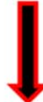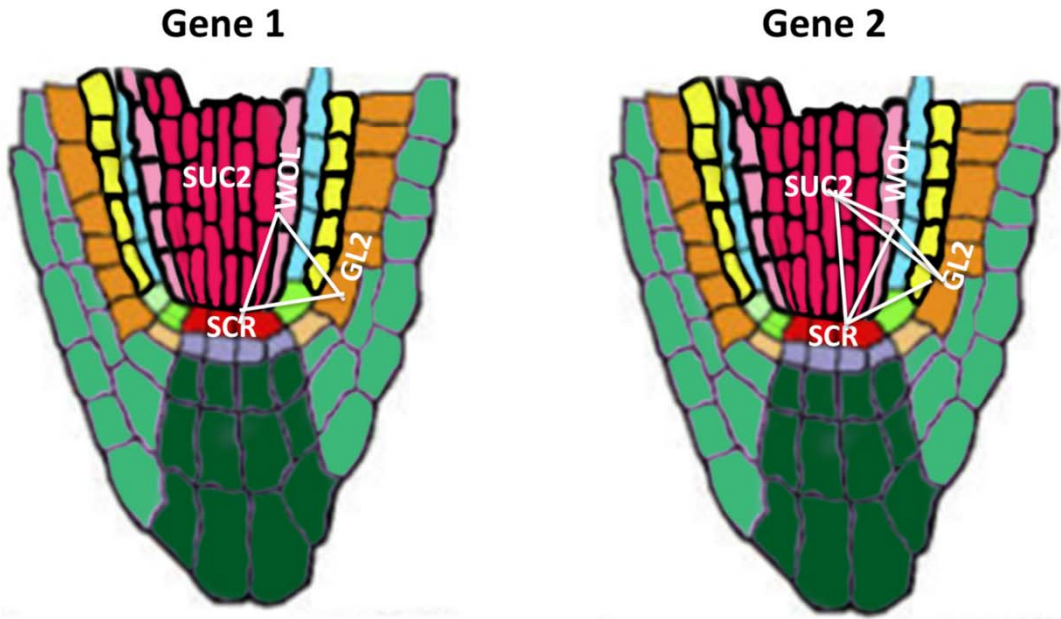



Figure S7

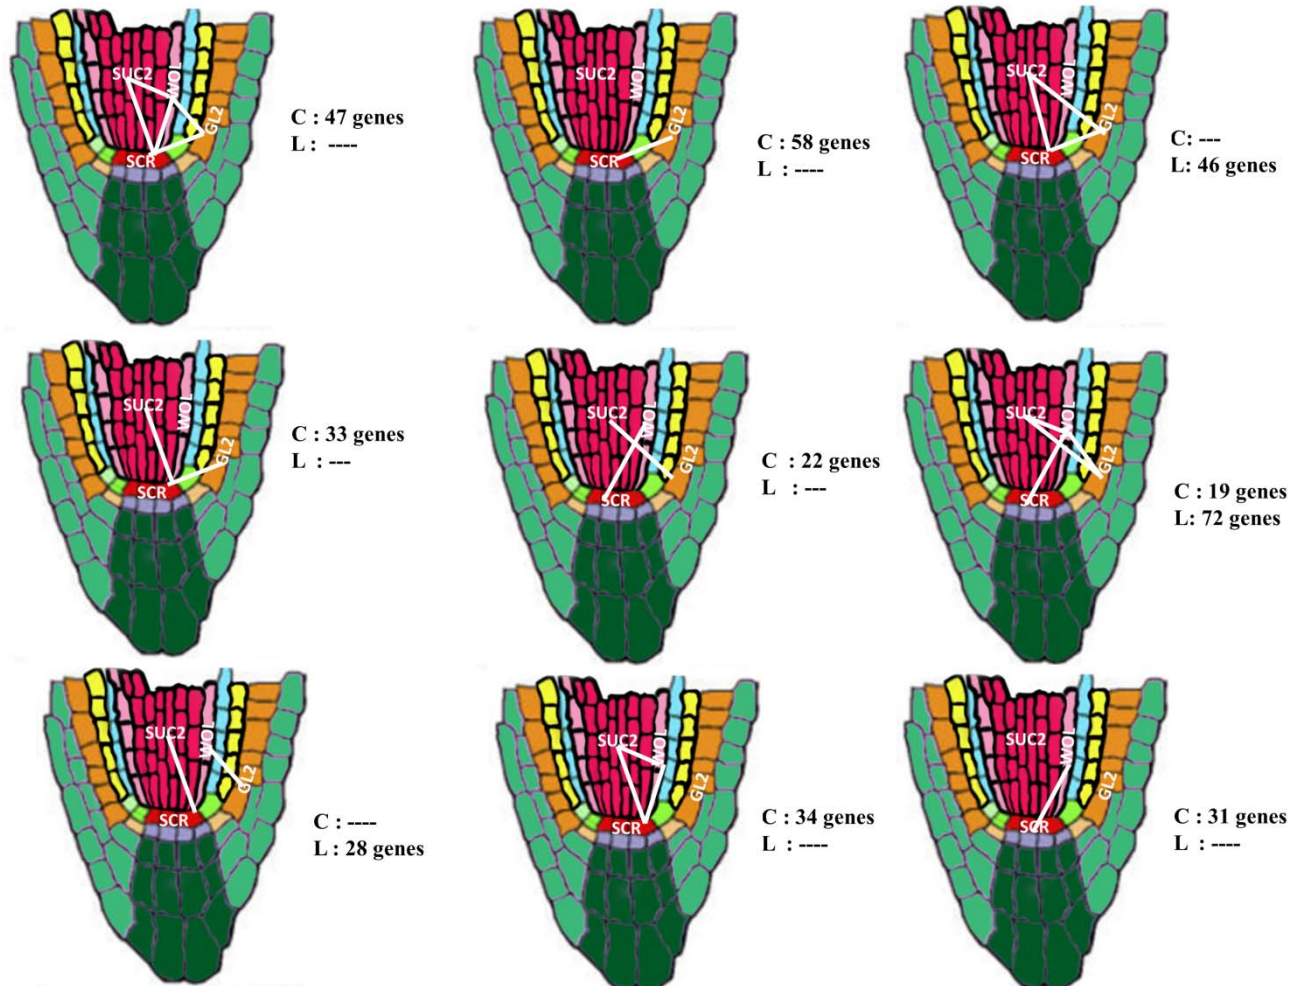

## SUPPLEMENTARY DATA

**Table S1: List of available cell types and their corresponding promoters in the transcriptome and translome dataset.**

| Promoter | Targeting cell type                         | Dataset       | Dataset source              | Promoter source                              |
|----------|---------------------------------------------|---------------|-----------------------------|----------------------------------------------|
| AGL 42   | Quiescent centre                            | Transcriptome | Nawy et al. 2005            | Nawy et al.2005                              |
| PET 111  | Columella tier 2                            | Transcriptome | Nawy et al. 2005            | Nawy et al.2005                              |
| LRC      | Lateral root cap                            | Transcriptome | Birnbaum et al.2003         | Birnbaum et al.2003                          |
| GL2      | Non-hair cells                              | Transcriptome | Birnbaum et al.2003         | Birnbaum et al.2003                          |
| J0571    | Ground endodermis+cortex+quiescent centre   | Transcriptome | Birnbaum et al.2003         | Birnbaum et al.2003                          |
| S17      | Phloem pole pericycle                       | Transcriptome | Brady, Orlando, et al. 2007 | Lee et al.; 2006                             |
| S32      | Protophloem and Metaphloem                  | Transcriptome | Brady, Orlando, et al. 2007 | Lee et al.; 2006                             |
| COBL9    | Isolated hair cells                         | Transcriptome | Brady, Orlando, et al. 2007 | Brady, Song, et al. 2007                     |
| JO121    | Xylem pole pericycle                        | Transcriptome | Brady, Orlando, et al. 2007 | Laplaze et al. 2005                          |
| S4       | Isolated Protoxylem and Metaphloem          | Transcriptome | Brady, Orlando, et al. 2007 | Lee et al.; 2006                             |
| WOL      | Stele                                       | Transcriptome | Birnbaum et al.2003         | Birnbaum et al.2003                          |
| SCR      | Quiescent centre                            | Transcriptome | Birnbaum et al.2003         | Birnbaum et al.2003                          |
| SUC2     | Phloem companion cells                      | Transcriptome | Brady, Orlando, et al. 2007 | Imlau et al. 1999                            |
| J2501    | Pericycle, protoxylem, metaxylem            | Transcriptome | Brady, Orlando, et al. 2007 | Gift from Ken Birnbaum/Hasslehoff collection |
| RM1000   | Lateral root primordia initials             | Transcriptome | Brady, Orlando, et al. 2007 | Gift from Laurent Nussaume                   |
| J2661    | Mature pericycle                            | Transcriptome | Levesque et al. 2006        | Levesque et al.2006                          |
| APL      | Phloem sieve cells and companion cells      | Transcriptome | Lee et al. 2006             | Lee et al.2006                               |
| CORTEX   | Cortex                                      | Transcriptome | Lee et al. 2006             | Lee et al.2006                               |
| S18      | Differentiating xylem                       | Transcriptome | Lee et al. 2006             | Lee et al.2006                               |
| 35S      | Root proliferating cells                    | Translatome   | Mustroph et al. 2009        | Zanetti et al. 2005                          |
| SCR      | Root endodermis and Quiescent Centre        | Translatome   | Mustroph et al. 2009        | Wysocka-Diller et al. 2000                   |
| SHR      | Root vasculature                            | Translatome   | Mustroph et al. 2009        | Helariutta et al. 2000                       |
| WOL      | Root vasculature                            | Translatome   | Mustroph et al. 2009        | Estelle 2001                                 |
| GL2      | Root atrichoblast epidermis                 | Translatome   | Mustroph et al. 2009        | Masucci et al. 1996; Szymanski et al. 1998   |
| SULTR2   | Root phloem companion cells                 | Translatome   | Mustroph et al. 2009        | Takahashi et al. 2000                        |
| CO2      | Root Cortex meristematic zone               | Translatome   | Mustroph et al. 2009        | Heidstra et al. 2004                         |
| PEP      | Root Cortex elongation and maturation zone. | Translatome   | Mustroph et al. 2009        | Mace et al. 2006                             |
| RPL11C   | Root proliferating cells                    | Translatome   | Mustroph et al. 2009        | Williams and Sussex 1995                     |
| SUC2     | Sucrose transporter                         | Translatome   | Mustroph et al. 2009        | Imlau et al. 1999                            |

**Table S2: Enriched GO-terms of coupled/uncoupled gene expression patterns on transcriptome and transcriptome for the identical promoter data.**

| <b>Coupled/<br/>uncoupled</b> | <b>GO-term</b> | <b>Term description</b>                                         | <b>No. of<br/>genes</b> | <b>p-value</b> |
|-------------------------------|----------------|-----------------------------------------------------------------|-------------------------|----------------|
| C                             | GO:0000041     | transition metal ion transport                                  | 9                       | 3.26E-02       |
| C                             | GO:0000278     | mitotic cell cycle                                              | 4                       | 1.36E-02       |
| C                             | GO:0006184     | GTP catabolic process                                           | 4                       | 2.73E-02       |
| C                             | GO:0006355     | regulation of transcription, DNA-dependent                      | 77                      | 3.31E-02       |
| C                             | GO:0006468     | protein phosphorylation                                         | 51                      | 1.71E-02       |
| C                             | GO:0006633     | fatty acid biosynthetic process                                 | 8                       | 4.04E-02       |
| C                             | GO:0006661     | phosphatidylinositol biosynthetic process                       | 8                       | 2.35E-02       |
| C                             | GO:0006807     | nitrogen compound metabolic process                             | 4                       | 1.75E-02       |
| C                             | GO:0006857     | oligopeptide transport                                          | 10                      | 8.20E-03       |
| C                             | GO:0006970     | response to osmotic stress                                      | 10                      | 2.16E-02       |
| C                             | GO:0006995     | cellular response to nitrogen starvation                        | 3                       | 4.40E-02       |
| C                             | GO:0007169     | transmembrane receptor protein tyrosine kinase signaling        | 10                      | 2.51E-02       |
| C                             | GO:0008610     | lipid biosynthetic process                                      | 4                       | 1.36E-02       |
| C                             | GO:0009416     | response to light stimulus                                      | 11                      | 4.93E-02       |
| C                             | GO:0009553     | embryo sac development                                          | 5                       | 3.15E-02       |
| C                             | GO:0009611     | response to wounding                                            | 20                      | 1.92E-02       |
| C                             | GO:0009617     | response to bacterium                                           | 12                      | 2.08E-02       |
| C                             | GO:0009741     | response to brassinosteroid stimulus                            | 7                       | 2.23E-02       |
| C                             | GO:0009834     | secondary cell wall biogenesis                                  | 5                       | 4.00E-03       |
| C                             | GO:0009862     | systemic acquired resistance, salicylic acid med. sign. pathway | 17                      | 2.35E-02       |
| C                             | GO:0009886     | post-embryonic morphogenesis                                    | 3                       | 3.09E-02       |
| C                             | GO:0009908     | flower development                                              | 8                       | 1.62E-02       |
| C                             | GO:0009939     | positive regulation of gibberellic acid mediated signaling      | 3                       | 3.26E-04       |
| C                             | GO:0010014     | meristem initiation                                             | 10                      | 2.51E-02       |
| C                             | GO:0010073     | meristem maintenance                                            | 6                       | 3.97E-02       |
| C                             | GO:0010089     | xylem development                                               | 9                       | 3.99E-03       |
| C                             | GO:0010150     | leaf senescence                                                 | 7                       | 6.88E-03       |
| C                             | GO:0010162     | seed dormancy process                                           | 11                      | 2.68E-02       |
| C                             | GO:0010167     | response to nitrate                                             | 15                      | 9.78E-03       |
| C                             | GO:0010260     | organ senescence                                                | 4                       | 1.75E-02       |
| C                             | GO:0010440     | stomatal lineage progression                                    | 5                       | 4.87E-02       |
| C                             | GO:0010583     | response to cyclopentenone                                      | 12                      | 1.30E-02       |
| C                             | GO:0015706     | nitrate transport                                               | 15                      | 1.57E-02       |
| C                             | GO:0016569     | covalent chromatin modification                                 | 3                       | 2.02E-02       |
| C                             | GO:0042218     | 1-aminocyclopropane-1-carboxylate biosynthetic process          | 3                       | 3.09E-02       |
| C                             | GO:0042546     | cell wall biogenesis                                            | 7                       | 1.06E-02       |
| C                             | GO:0043069     | negative regulation of programmed cell death                    | 13                      | 1.28E-02       |
| C                             | GO:0045454     | cell redox homeostasis                                          | 12                      | 3.69E-03       |
| C                             | GO:0046855     | inositol phosphate dephosphorylation                            | 3                       | 3.94E-02       |
| U                             | GO:0006486     | protein glycosylation                                           | 7                       | 8.04E-03       |
| U                             | GO:0007010     | cytoskeleton organization                                       | 5                       | 4.61E-02       |
| U                             | GO:0009607     | response to biotic stimulus                                     | 4                       | 1.63E-03       |
| U                             | GO:0009860     | pollen tube growth                                              | 8                       | 4.26E-02       |
| U                             | GO:0009886     | post-embryonic morphogenesis                                    | 3                       | 3.41E-03       |
| U                             | GO:0016579     | protein deubiquitination                                        | 3                       | 4.22E-02       |
| U                             | GO:0048364     | root development                                                | 7                       | 3.89E-03       |
| U                             | GO:0048366     | leaf development                                                | 5                       | 3.95E-02       |
| U                             | GO:0048440     | carpel development                                              | 4                       | 3.43E-02       |
| U                             | GO:0048507     | meristem development                                            | 3                       | 2.41E-02       |
| U                             | GO:0048653     | anther development                                              | 4                       | 1.20E-02       |
| U                             | GO:0048825     | cotyledon development                                           | 5                       | 6.47E-03       |
| U                             | GO:0051301     | cell division                                                   | 5                       | 1.22E-02       |

**Table S3: Enriched GO-terms of coupled/uncoupled gene expression patters on translatoe and transcriptome for the common promoters.**

| Coupled/<br>uncoupled | GO-term    | Term description                                                | No.<br>of<br>genes | p-value  |
|-----------------------|------------|-----------------------------------------------------------------|--------------------|----------|
| C                     | GO:0000023 | maltose metabolic process                                       | 10                 | 2.55E-02 |
| C                     | GO:0000041 | transition metal ion transport                                  | 9                  | 1.53E-02 |
| C                     | GO:0000956 | nuclear-transcribed mRNA catabolic process                      | 12                 | 1.09E-04 |
| C                     | GO:0006355 | regulation of transcription, DNA-dependent                      | 68                 | 3.73E-02 |
| C                     | GO:0006399 | tRNA metabolic process                                          | 4                  | 2.61E-02 |
| C                     | GO:0006468 | protein phosphorylation                                         | 45                 | 2.13E-02 |
| C                     | GO:0006817 | phosphate ion transport                                         | 3                  | 3.14E-02 |
| C                     | GO:0006914 | Autophagy                                                       | 5                  | 4.99E-02 |
| C                     | GO:0007043 | cell-cell junction assembly                                     | 3                  | 2.21E-04 |
| C                     | GO:0007165 | signal transduction                                             | 28                 | 1.26E-02 |
| C                     | GO:0007186 | G-protein coupled receptor signaling pathway                    | 3                  | 4.27E-03 |
| C                     | GO:0007188 | adenylate cyclase-modulating G-prot. coupled receptor sign.     | 3                  | 8.98E-05 |
| C                     | GO:0007346 | regulation of mitotic cell cycle                                | 3                  | 4.71E-02 |
| C                     | GO:0007389 | pattern specification process                                   | 5                  | 3.21E-02 |
| C                     | GO:0008219 | cell death                                                      | 5                  | 3.44E-02 |
| C                     | GO:0009416 | response to light stimulus                                      | 11                 | 2.17E-02 |
| C                     | GO:0009630 | Gravitropism                                                    | 8                  | 4.95E-02 |
| C                     | GO:0009638 | Phototropism                                                    | 3                  | 5.45E-03 |
| C                     | GO:0009733 | response to auxin stimulus                                      | 18                 | 4.21E-02 |
| C                     | GO:0009789 | positive regulation of abscisic acid mediated signaling pathway | 3                  | 1.42E-02 |
| C                     | GO:0009886 | post-embryonic morphogenesis                                    | 3                  | 2.18E-02 |
| C                     | GO:0009902 | chloroplast relocation                                          | 9                  | 5.57E-03 |
| C                     | GO:0010027 | thylakoid membrane organization                                 | 13                 | 1.91E-02 |
| C                     | GO:0010051 | xylem and phloem pattern formation                              | 7                  | 5.76E-03 |
| C                     | GO:0010119 | regulation of stomatal movement                                 | 4                  | 1.96E-02 |
| C                     | GO:0010413 | glucuronoxylan metabolic process                                | 16                 | 4.81E-04 |
| C                     | GO:0016114 | terpenoid biosynthetic process                                  | 4                  | 3.66E-02 |
| C                     | GO:0016558 | protein import into peroxisome matrix                           | 7                  | 3.55E-02 |
| C                     | GO:0016569 | covalent chromatin modification                                 | 3                  | 1.42E-02 |
| C                     | GO:0019252 | starch biosynthetic process                                     | 14                 | 4.14E-03 |
| C                     | GO:0032957 | inositol trisphosphate metabolic process                        | 3                  | 1.91E-02 |
| C                     | GO:0034660 | ncRNA metabolic process                                         | 9                  | 1.26E-03 |
| C                     | GO:0042545 | cell wall modification                                          | 11                 | 1.81E-03 |
| C                     | GO:0045492 | xylan biosynthetic process                                      | 16                 | 4.81E-04 |
| C                     | GO:0046777 | protein autophosphorylation                                     | 9                  | 3.70E-02 |
| C                     | GO:0046855 | inositol phosphate dephosphorylation                            | 3                  | 2.80E-02 |
| C                     | GO:0048439 | flower morphogenesis                                            | 6                  | 2.27E-02 |
| C                     | GO:0048519 | negative regulation of biological process                       | 5                  | 1.34E-02 |
| C                     | GO:0048527 | lateral root development                                        | 7                  | 1.15E-02 |
| C                     | GO:0048574 | long-day photoperiodism, flowering                              | 3                  | 1.20E-02 |
| C                     | GO:2000067 | regulation of root morphogenesis                                | 3                  | 8.98E-05 |
| U                     | GO:0000902 | cell morphogenesis                                              | 4                  | 6.85E-03 |
| U                     | GO:0006486 | protein glycosylation                                           | 6                  | 8.38E-03 |
| U                     | GO:0006816 | calcium ion transport                                           | 6                  | 3.71E-03 |
| U                     | GO:0006863 | purine nucleobase transport                                     | 4                  | 4.41E-02 |
| U                     | GO:0006972 | hyperosmotic response                                           | 4                  | 3.14E-02 |
| U                     | GO:0009734 | auxin mediated signaling pathway                                | 3                  | 8.08E-03 |
| U                     | GO:0010584 | pollen exine formation                                          | 3                  | 2.70E-02 |
| U                     | GO:0015986 | ATP synthesis coupled proton transport                          | 3                  | 2.82E-03 |
| U                     | GO:0016049 | cell growth                                                     | 7                  | 6.60E-04 |
| U                     | GO:0030243 | cellulose metabolic process                                     | 3                  | 6.31E-03 |
| U                     | GO:0044237 | cellular metabolic process                                      | 3                  | 3.83E-02 |
| U                     | GO:0048868 | pollen tube development                                         | 3                  | 2.34E-02 |
| U                     | GO:0080022 | primary root development                                        | 4                  | 3.32E-05 |

**Table S4: GSEA of GO-BP terms for AEC genes for identical promoter data.** A + indicates a high degree of conservation of co-expression relationships derived by Z-scores, while a – indicates divergences of co-expression relationships on the translome and transcriptome.

| AEC | GO-term    | Term description                                     | No. of genes | p-value  |
|-----|------------|------------------------------------------------------|--------------|----------|
| +   | GO:0006355 | regulation of transcription, DNA-dependent           | 12           | 4.47E-03 |
| +   | GO:0030968 | endoplasmic reticulum unfolded protein response      | 3            | 1.52E-02 |
| +   | GO:0042546 | cell wall biogenesis                                 | 3            | 8.20E-04 |
| +   | GO:0055085 | transmembrane transport                              | 4            | 4.53E-02 |
| +   | GO:0071555 | cell wall organization                               | 3            | 6.27E-03 |
| -   | GO:0000338 | protein deneddylation                                | 5            | 7.53E-03 |
| -   | GO:0000956 | nuclear-transcribed mRNA catabolic process           | 57           | 1.07E-03 |
| -   | GO:0002679 | respiratory burst involved in defense response       | 79           | 8.54E-07 |
| -   | GO:0006091 | generation of precursor metabolites and energy       | 64           | 1.45E-21 |
| -   | GO:0006120 | mitochondrial electron transport, NADH to ubiquinone | 5            | 3.22E-02 |
| -   | GO:0006353 | DNA-dependent transcription, termination             | 3            | 4.03E-02 |
| -   | GO:0006354 | DNA-dependent transcription, elongation              | 91           | 2.25E-12 |
| -   | GO:0006511 | ubiquitin-dependent protein catabolic process        | 146          | 3.62E-03 |
| -   | GO:0006569 | tryptophan catabolic process                         | 47           | 2.71E-03 |
| -   | GO:0006826 | iron ion transport                                   | 62           | 2.08E-02 |
| -   | GO:0006863 | purine nucleobase transport                          | 87           | 9.65E-16 |
| -   | GO:0006873 | cellular ion homeostasis                             | 3            | 4.03E-02 |
| -   | GO:0006882 | cellular zinc ion homeostasis                        | 11           | 4.14E-02 |
| -   | GO:0006952 | defense response                                     | 169          | 1.46E-02 |
| -   | GO:0006974 | response to DNA damage stimulus                      | 9            | 3.42E-02 |
| -   | GO:0007243 | intracellular protein kinase cascade                 | 10           | 3.82E-02 |
| -   | GO:0007275 | multicellular organismal development                 | 67           | 1.89E-02 |
| -   | GO:0007346 | regulation of mitotic cell cycle                     | 18           | 1.37E-02 |
| -   | GO:0008272 | sulfate transport                                    | 10           | 1.97E-02 |
| -   | GO:0008643 | carbohydrate transport                               | 6            | 4.34E-02 |
| -   | GO:0009150 | purine ribonucleotide metabolic process              | 3            | 4.03E-02 |
| -   | GO:0009414 | response to water deprivation                        | 147          | 1.06E-02 |
| -   | GO:0009607 | response to biotic stimulus                          | 22           | 3.73E-03 |
| -   | GO:0009611 | response to wounding                                 | 158          | 9.79E-04 |
| -   | GO:0009612 | response to mechanical stimulus                      | 38           | 3.17E-05 |
| -   | GO:0009615 | response to virus                                    | 16           | 4.97E-02 |
| -   | GO:0009620 | response to fungus                                   | 59           | 3.73E-04 |
| -   | GO:0009646 | response to absence of light                         | 16           | 3.25E-02 |
| -   | GO:0009653 | anatomical structure morphogenesis                   | 9            | 6.16E-03 |
| -   | GO:0009684 | indoleacetic acid biosynthetic process               | 59           | 5.07E-03 |
| -   | GO:0009693 | ethylene biosynthetic process                        | 70           | 3.19E-05 |
| -   | GO:0009695 | jasmonic acid biosynthetic process                   | 70           | 4.54E-03 |
| -   | GO:0009753 | response to jasmonic acid stimulus                   | 135          | 3.55E-04 |
| -   | GO:0009767 | photosynthetic electron transport chain              | 11           | 2.28E-02 |
| -   | GO:0009769 | photosynthesis, light harvesting in photosystem II   | 5            | 7.53E-03 |
| -   | GO:0009809 | lignin biosynthetic process                          | 25           | 7.65E-03 |
| -   | GO:0009853 | Photorespiration                                     | 88           | 1.86E-04 |
| -   | GO:0009966 | regulation of signal transduction                    | 7            | 2.30E-02 |
| -   | GO:0010038 | response to metal ion                                | 7            | 2.30E-02 |
| -   | GO:0010043 | response to zinc ion                                 | 30           | 2.59E-02 |
| -   | GO:0010106 | cellular response to iron ion starvation             | 58           | 4.14E-02 |
| -   | GO:0010167 | response to nitrate                                  | 104          | 1.75E-03 |
| -   | GO:0010200 | response to chitin                                   | 232          | 1.39E-08 |
| -   | GO:0010254 | nectary development                                  | 3            | 4.03E-02 |
| -   | GO:0010262 | somatic embryogenesis                                | 5            | 3.22E-02 |
| -   | GO:0010286 | heat acclimation                                     | 43           | 3.67E-03 |
| -   | GO:0010289 | homogalacturonan biosynthetic process                | 3            | 4.03E-02 |
| -   | GO:0010337 | regulation of salicylic acid metabolic process       | 6            | 4.34E-02 |
| -   | GO:0010387 | signalosome assembly                                 | 5            | 3.22E-02 |
| -   | GO:0010390 | histone monoubiquitination                           | 4            | 1.74E-02 |
| -   | GO:0010434 | bract formation                                      | 3            | 4.03E-02 |
| -   | GO:0010438 | cellular response to sulfur starvation               | 4            | 1.74E-02 |

|   |            |                                                          |     |          |
|---|------------|----------------------------------------------------------|-----|----------|
| - | GO:0010507 | negative regulation of autophagy                         | 3   | 4.03E-02 |
| - | GO:0010599 | production of lsiRNA involved in RNA interference        | 3   | 4.03E-02 |
| - | GO:0015675 | nickel cation transport                                  | 3   | 4.03E-02 |
| - | GO:0015706 | nitrate transport                                        | 111 | 7.94E-04 |
| - | GO:0015866 | ADP transport                                            | 3   | 4.03E-02 |
| - | GO:0015979 | Photosynthesis                                           | 140 | 3.08E-12 |
| - | GO:0015986 | ATP synthesis coupled proton transport                   | 17  | 7.13E-03 |
| - | GO:0015991 | ATP hydrolysis coupled proton transport                  | 16  | 3.25E-02 |
| - | GO:0015992 | proton transport                                         | 12  | 4.40E-02 |
| - | GO:0016106 | sesquiterpenoid biosynthetic process                     | 3   | 4.03E-02 |
| - | GO:0016441 | posttranscriptional gene silencing                       | 7   | 2.30E-02 |
| - | GO:0018119 | peptidyl-cysteine S-nitrosylation                        | 11  | 1.12E-02 |
| - | GO:0019684 | photosynthesis, light reaction                           | 80  | 5.03E-03 |
| - | GO:0019761 | glucosinolate biosynthetic process                       | 88  | 1.73E-03 |
| - | GO:0030010 | establishment of cell polarity                           | 3   | 4.03E-02 |
| - | GO:0030029 | actin filament-based process                             | 5   | 7.53E-03 |
| - | GO:0030048 | actin filament-based movement                            | 43  | 2.95E-02 |
| - | GO:0030308 | negative regulation of cell growth                       | 4   | 1.74E-02 |
| - | GO:0031930 | mitochondria-nucleus signaling pathway                   | 4   | 1.74E-02 |
| - | GO:0034605 | cellular response to heat                                | 9   | 3.42E-02 |
| - | GO:0034755 | iron ion transmembrane transport                         | 4   | 1.74E-02 |
| - | GO:0035556 | intracellular signal transduction                        | 102 | 1.44E-03 |
| - | GO:0042218 | 1-aminocyclopropane-1-carboxylate biosynthetic           | 15  | 5.33E-03 |
| - | GO:0042325 | regulation of phosphorylation                            | 3   | 4.03E-02 |
| - | GO:0042742 | defense response to bacterium                            | 159 | 2.63E-02 |
| - | GO:0042773 | ATP synthesis coupled electron transport                 | 8   | 6.06E-04 |
| - | GO:0043069 | negative regulation of programmed cell death             | 84  | 2.31E-02 |
| - | GO:0043255 | regulation of carbohydrate biosynthetic process          | 3   | 4.03E-02 |
| - | GO:0045333 | cellular respiration                                     | 20  | 2.99E-04 |
| - | GO:0046168 | glycerol-3-phosphate catabolic process                   | 3   | 4.03E-02 |
| - | GO:0046786 | viral replication complex formation and maintenance      | 4   | 1.74E-02 |
| - | GO:0048507 | meristem development                                     | 24  | 3.62E-02 |
| - | GO:0048510 | reg. of timing of trans. from veg. to reproductive phase | 14  | 1.72E-02 |
| - | GO:0048523 | negative regulation of cellular process                  | 6   | 1.57E-02 |
| - | GO:0048830 | adventitious root development                            | 4   | 1.74E-02 |
| - | GO:0048869 | cellular developmental process                           | 7   | 1.40E-03 |
| - | GO:0051026 | chiasma assembly                                         | 8   | 2.92E-02 |
| - | GO:0051090 | regulation of sequence-specific DNA binding TF           | 3   | 4.03E-02 |
| - | GO:0051127 | positive regulation of actin nucleation                  | 3   | 4.03E-02 |
| - | GO:0051603 | proteolysis involved in cellular protein catabolic       | 17  | 1.75E-03 |
| - | GO:0051788 | response to misfolded protein                            | 95  | 7.25E-03 |
| - | GO:0051865 | protein autoubiquitination                               | 9   | 1.71E-03 |
| - | GO:0052542 | defense response by callose deposition                   | 26  | 4.90E-02 |
| - | GO:0055062 | phosphate ion homeostasis                                | 7   | 2.30E-02 |
| - | GO:0070301 | cellular response to hydrogen peroxide                   | 3   | 4.03E-02 |
| - | GO:0070734 | histone H3-K27 methylation                               | 3   | 4.03E-02 |
| - | GO:0071456 | cellular response to hypoxia                             | 14  | 4.76E-02 |
| - | GO:0071722 | detoxification of arsenic-containing substance           | 3   | 4.03E-02 |
| - | GO:0072334 | UDP-galactose transmembrane transport                    | 3   | 4.03E-02 |
| - | GO:0080003 | thalianol metabolic process                              | 3   | 4.03E-02 |
| - | GO:0080027 | response to herbivore                                    | 7   | 1.40E-03 |
| - | GO:0080086 | stamen filament development                              | 7   | 7.59E-03 |
| - | GO:0080129 | proteasome core complex assembly                         | 72  | 8.44E-04 |

**Table S5: GSEA of GO-BP terms for AEC genes for the common promoters.** A + indicates a high degree of conservation of co-expression relationships derived by Z-scores, while a – indicates divergences of co-expression relationships on the translome and transcriptome.

| AEC | GO-term    | Term description                                            | No. of genes | p-value  |
|-----|------------|-------------------------------------------------------------|--------------|----------|
| +   | GO:0000271 | polysaccharide biosynthetic process                         | 3            | 3.26E-04 |
| +   | GO:0007165 | signal transduction                                         | 4            | 8.68E-03 |
| +   | GO:0007389 | pattern specification process                               | 3            | 8.18E-05 |
| +   | GO:0008361 | regulation of cell size                                     | 3            | 4.52E-05 |
| +   | GO:0009825 | multidimensional cell growth                                | 3            | 2.47E-04 |
| +   | GO:0009926 | auxin polar transport                                       | 3            | 1.60E-04 |
| +   | GO:0009932 | cell tip growth                                             | 3            | 2.20E-04 |
| +   | GO:0010015 | root morphogenesis                                          | 3            | 3.68E-05 |
| +   | GO:0010075 | regulation of meristem growth                               | 4            | 9.70E-05 |
| +   | GO:0010817 | regulation of hormone levels                                | 3            | 1.40E-04 |
| +   | GO:0040007 | Growth                                                      | 3            | 7.75E-05 |
| +   | GO:0043481 | anthocyanin accumulation in tissues in response to UV light | 3            | 6.75E-04 |
| +   | GO:0048767 | root hair elongation                                        | 3            | 2.45E-03 |
| +   | GO:0071555 | cell wall organization                                      | 3            | 1.04E-03 |
| -   | GO:0000041 | transition metal ion transport                              | 78           | 2.12E-03 |
| -   | GO:0000059 | protein import into nucleus, docking                        | 11           | 1.51E-02 |
| -   | GO:0000302 | response to reactive oxygen species                         | 21           | 2.78E-02 |
| -   | GO:0000338 | protein deneddylation                                       | 5            | 2.45E-02 |
| -   | GO:0000461 | endonucleolytic cleavage                                    | 4            | 4.48E-02 |
| -   | GO:0002679 | respiratory burst involved in defense response              | 90           | 7.35E-06 |
| -   | GO:0006071 | glycerol metabolic process                                  | 12           | 2.52E-02 |
| -   | GO:0006091 | generation of precursor metabolites and energy              | 65           | 1.30E-16 |
| -   | GO:0006352 | DNA-dependent transcription, initiation                     | 25           | 2.33E-02 |
| -   | GO:0006354 | DNA-dependent transcription, elongation                     | 94           | 3.06E-07 |
| -   | GO:0006355 | regulation of transcription, DNA-dependent                  | 893          | 5.33E-03 |
| -   | GO:0006511 | ubiquitin-dependent protein catabolic process               | 179          | 3.31E-03 |
| -   | GO:0006569 | tryptophan catabolic process                                | 54           | 1.03E-02 |
| -   | GO:0006612 | protein targeting to membrane                               | 217          | 3.24E-02 |
| -   | GO:0006629 | lipid metabolic process                                     | 122          | 2.97E-02 |
| -   | GO:0006636 | unsaturated fatty acid biosynthetic process                 | 46           | 1.55E-02 |
| -   | GO:0006680 | glucosylceramide catabolic process                          | 4            | 4.48E-02 |
| -   | GO:0006814 | sodium ion transport                                        | 26           | 1.70E-02 |
| -   | GO:0006826 | iron ion transport                                          | 83           | 2.61E-04 |
| -   | GO:0006857 | oligopeptide transport                                      | 76           | 2.80E-04 |
| -   | GO:0006863 | purine nucleobase transport                                 | 96           | 8.25E-15 |
| -   | GO:0006886 | intracellular protein transport                             | 109          | 3.21E-02 |
| -   | GO:0006952 | defense response                                            | 219          | 4.33E-04 |
| -   | GO:0006984 | ER-nucleus signaling pathway                                | 11           | 3.83E-02 |
| -   | GO:0007243 | intracellular protein kinase cascade                        | 13           | 5.80E-03 |
| -   | GO:0008272 | sulfate transport                                           | 11           | 3.83E-02 |
| -   | GO:0009228 | thiamine biosynthetic process                               | 7            | 3.46E-02 |
| -   | GO:0009395 | phospholipid catabolic process                              | 5            | 2.45E-02 |
| -   | GO:0009414 | response to water deprivation                               | 177          | 3.24E-02 |
| -   | GO:0009607 | response to biotic stimulus                                 | 24           | 1.85E-02 |
| -   | GO:0009611 | response to wounding                                        | 192          | 1.32E-03 |
| -   | GO:0009612 | response to mechanical stimulus                             | 44           | 2.13E-05 |
| -   | GO:0009620 | response to fungus                                          | 69           | 7.64E-04 |
| -   | GO:0009637 | response to blue light                                      | 64           | 4.24E-03 |
| -   | GO:0009646 | response to absence of light                                | 23           | 1.50E-04 |
| -   | GO:0009649 | entrainment of circadian clock                              | 5            | 2.45E-02 |
| -   | GO:0009653 | anatomical structure morphogenesis                          | 9            | 3.80E-02 |
| -   | GO:0009684 | indoleacetic acid biosynthetic process                      | 68           | 2.48E-02 |
| -   | GO:0009693 | ethylene biosynthetic process                               | 80           | 2.37E-04 |
| -   | GO:0009694 | jasmonic acid metabolic process                             | 25           | 2.33E-02 |
| -   | GO:0009695 | jasmonic acid biosynthetic process                          | 92           | 3.40E-05 |
| -   | GO:0009734 | auxin mediated signaling pathway                            | 26           | 1.70E-02 |
| -   | GO:0009751 | response to salicylic acid stimulus                         | 81           | 1.93E-02 |
| -   | GO:0009753 | response to jasmonic acid stimulus                          | 164          | 2.92E-04 |

|   |            |                                                            |     |          |
|---|------------|------------------------------------------------------------|-----|----------|
| - | GO:0009767 | photosynthetic electron transport chain                    | 13  | 1.64E-02 |
| - | GO:0009768 | photosynthesis, light harvesting in photosystem I          | 4   | 4.48E-02 |
| - | GO:0009769 | photosynthesis, light harvesting in photosystem II         | 5   | 2.45E-02 |
| - | GO:0009773 | photosynthetic electron transport in photosystem I         | 36  | 1.73E-02 |
| - | GO:0009813 | flavonoid biosynthetic process                             | 40  | 1.41E-02 |
| - | GO:0009867 | jasmonic acid mediated signaling pathway                   | 170 | 4.44E-03 |
| - | GO:0009939 | positive regulation of gibberellic acid mediated signaling | 5   | 2.45E-02 |
| - | GO:0010043 | response to zinc ion                                       | 37  | 1.31E-02 |
| - | GO:0010093 | specification of floral organ identity                     | 24  | 1.01E-02 |
| - | GO:0010103 | stomatal complex morphogenesis                             | 89  | 1.30E-02 |
| - | GO:0010106 | cellular response to iron ion starvation                   | 78  | 9.66E-04 |
| - | GO:0010107 | potassium ion import                                       | 4   | 4.48E-02 |
| - | GO:0010114 | response to red light                                      | 59  | 2.56E-02 |
| - | GO:0010167 | response to nitrate                                        | 130 | 2.35E-04 |
| - | GO:0010200 | response to chitin                                         | 286 | 9.33E-11 |
| - | GO:0010207 | photosystem II assembly                                    | 111 | 2.51E-03 |
| - | GO:0010231 | maintenance of seed dormancy                               | 4   | 4.48E-02 |
| - | GO:0010286 | heat acclimation                                           | 52  | 2.03E-03 |
| - | GO:0010363 | regulation of plant-type hypersensitive response           | 220 | 2.36E-02 |
| - | GO:0010390 | histone monoubiquitination                                 | 4   | 4.48E-02 |
| - | GO:0010438 | cellular response to sulfur starvation                     | 4   | 4.48E-02 |
| - | GO:0015706 | nitrate transport                                          | 137 | 1.97E-04 |
| - | GO:0015979 | Photosynthesis                                             | 164 | 6.86E-13 |
| - | GO:0018119 | peptidyl-cysteine S-nitrosylation                          | 12  | 2.52E-02 |
| - | GO:0019684 | photosynthesis, light reaction                             | 105 | 4.07E-05 |
| - | GO:0019761 | glucosinolate biosynthetic process                         | 101 | 1.96E-02 |
| - | GO:0030308 | negative regulation of cell growth                         | 4   | 4.48E-02 |
| - | GO:0031540 | regulation of anthocyanin biosynthetic process             | 12  | 2.52E-02 |
| - | GO:0031930 | mitochondria-nucleus signaling pathway                     | 4   | 4.48E-02 |
| - | GO:0034755 | iron ion transmembrane transport                           | 4   | 4.48E-02 |
| - | GO:0035556 | intracellular signal transduction                          | 125 | 6.82E-04 |
| - | GO:0035725 | sodium ion transmembrane transport                         | 31  | 1.75E-02 |
| - | GO:0042218 | 1-aminocyclopropane-1-carboxylate biosynthetic process     | 17  | 7.30E-03 |
| - | GO:0042549 | photosystem II stabilization                               | 7   | 7.33E-03 |
| - | GO:0042773 | ATP synthesis coupled electron transport                   | 7   | 3.46E-02 |
| - | GO:0043161 | proteasomal ubiquitin-dependent protein catabolic process  | 73  | 3.69E-02 |
| - | GO:0043407 | negative regulation of MAP kinase activity                 | 12  | 9.39E-03 |
| - | GO:0045333 | cellular respiration                                       | 20  | 1.10E-02 |
| - | GO:0045727 | positive regulation of translation                         | 13  | 1.46E-03 |
| - | GO:0046786 | viral replication complex formation and maintenance        | 4   | 4.48E-02 |
| - | GO:0048235 | pollen sperm cell differentiation                          | 20  | 2.15E-02 |
| - | GO:0048869 | cellular developmental process                             | 7   | 7.33E-03 |
| - | GO:0050832 | defense response to fungus                                 | 177 | 2.77E-02 |
| - | GO:0050994 | regulation of lipid catabolic process                      | 4   | 4.48E-02 |
| - | GO:0051603 | proteolysis involved in cellular protein catabolic process | 18  | 1.12E-02 |
| - | GO:0051865 | protein autoubiquitination                                 | 9   | 1.23E-02 |
| - | GO:0052542 | defense response by callose deposition                     | 32  | 3.26E-02 |
| - | GO:0055062 | phosphate ion homeostasis                                  | 8   | 2.07E-02 |
| - | GO:0055114 | oxidation-reduction process                                | 635 | 4.09E-02 |
| - | GO:0070838 | divalent metal ion transport                               | 53  | 4.67E-02 |
| - | GO:0071216 | cellular response to biotic stimulus                       | 11  | 3.83E-02 |
| - | GO:0071577 | zinc ion transmembrane transport                           | 10  | 2.41E-02 |
| - | GO:0071786 | endoplasmic reticulum tubular network organization         | 5   | 2.45E-02 |
| - | GO:0080027 | response to herbivore                                      | 7   | 7.33E-03 |
| - | GO:0080086 | stamen filament development                                | 7   | 3.46E-02 |
| - | GO:0080129 | proteasome core complex assembly                           | 80  | 2.31E-02 |
| - | GO:0090333 | regulation of stomatal closure                             | 7   | 3.46E-02 |
| - | GO:2000037 | regulation of stomatal complex patterning                  | 5   | 2.45E-02 |
| - | GO:2000038 | regulation of stomatal complex development                 | 5   | 2.45E-02 |
| - | GO:2001141 | regulation of RNA biosynthetic process                     | 5   | 2.45E-02 |



**Table S6: All possible motif occurrences across the identical promoters of transcriptome and translome.** The observed motifs are depicted in the order mentioned in the third column header. A characteristic pattern of the pairwise differences are represented by 1 (significant mean difference of expression values) and 0(no significant mean difference of expression values).

| <b>System level</b> | <b>Number of genes</b> | <b>Observed motif</b><br>(GL2-SCR, GL2-WOL,SUC2-GL2,SUC2-SCR, SUC2-WOL, WOL-SCR) | <b>p-value</b> |
|---------------------|------------------------|----------------------------------------------------------------------------------|----------------|
| Transcriptome       | 214                    | 001110                                                                           | 0.00           |
| Transcriptome       | 58                     | 011111                                                                           | 0.00           |
| Transcriptome       | 47                     | 001000                                                                           | 0.00           |
| Transcriptome       | 33                     | 011101                                                                           | 0.00           |
| Transcriptome       | 34                     | 111000                                                                           | 0.00           |
| Transcriptome       | 31                     | 111110                                                                           | 0.00           |
| Transcriptome       | 22                     | 110110                                                                           | 0.00           |
| Transcriptome       | 19                     | 100100                                                                           | 0.04           |
| Transcriptome       | 26                     | 100000                                                                           | 0.20           |
| Transcriptome       | 25                     | 100101                                                                           | 0.02           |
| Transcriptome       | 23                     | 010011                                                                           | 0.07           |
| Transcriptome       | 25                     | 001010                                                                           | 0.99           |
| Transcriptome       | 67                     | 000000                                                                           | 1.00           |
| Transcriptome       | 25                     | 001100                                                                           | 1.00           |
| Transcriptome       | 16                     | 011110                                                                           | 1.00           |
| Translatome         | 203                    | 100101                                                                           | 0.00           |
| Translatome         | 94                     | 001110                                                                           | 0.00           |
| Translatome         | 72                     | 100100                                                                           | 0.00           |
| Translatome         | 46                     | 010011                                                                           | 0.00           |
| Translatome         | 28                     | 101011                                                                           | 0.00           |
| Translatome         | 29                     | 110110                                                                           | 0.01           |
| Translatome         | 45                     | 101110                                                                           | 0.11           |
| Translatome         | 37                     | 000110                                                                           | 0.11           |
| Translatome         | 8                      | 111011                                                                           | 0.92           |
| Translatome         | 57                     | 100110                                                                           | 0.95           |
| Translatome         | 23                     | 101111                                                                           | 0.99           |
| Translatome         | 12                     | 000100                                                                           | 0.99           |
| Translatome         | 10                     | 111000                                                                           | 0.99           |
| Translatome         | 21                     | 111111                                                                           | 1.00           |

**Table S7: Enriched GO-terms of gene with characteristic cell type specific gene expression patterns found for motif 1 and motif 2.**

| Motif | GO-term    | Term description                                      | No. of genes | p-value  |
|-------|------------|-------------------------------------------------------|--------------|----------|
| 1     | GO:0001666 | response to hypoxia                                   | 4            | 1.03E-02 |
| 1     | GO:0005986 | sucrose biosynthetic process                          | 3            | 1.31E-03 |
| 1     | GO:0006084 | acetyl-CoA metabolic process                          | 5            | 2.44E-03 |
| 1     | GO:0006085 | acetyl-CoA biosynthetic process                       | 3            | 2.02E-04 |
| 1     | GO:0006612 | protein targeting to membrane                         | 9            | 4.85E-02 |
| 1     | GO:0006810 | Transport                                             | 9            | 4.45E-02 |
| 1     | GO:0006833 | water transport                                       | 5            | 3.38E-02 |
| 1     | GO:0008033 | tRNA processing                                       | 3            | 4.79E-03 |
| 1     | GO:0008219 | cell death                                            | 3            | 2.59E-02 |
| 1     | GO:0009684 | indoleacetic acid biosynthetic process                | 4            | 3.74E-02 |
| 1     | GO:0009691 | cytokinin biosynthetic process                        | 3            | 5.25E-03 |
| 1     | GO:0009735 | response to cytokinin stimulus                        | 3            | 2.72E-02 |
| 1     | GO:0009736 | cytokinin mediated signaling pathway                  | 3            | 4.74E-02 |
| 1     | GO:0009741 | response to brassinosteroid stimulus                  | 4            | 1.19E-02 |
| 1     | GO:0009744 | response to sucrose stimulus                          | 9            | 1.29E-03 |
| 1     | GO:0009749 | response to glucose stimulus                          | 6            | 3.83E-04 |
| 1     | GO:0009750 | response to fructose stimulus                         | 6            | 9.06E-03 |
| 1     | GO:0009910 | negative regulation of flower development             | 3            | 1.37E-02 |
| 1     | GO:0009963 | positive regulation of flavonoid biosynthetic process | 6            | 1.79E-03 |
| 1     | GO:0010075 | regulation of meristem growth                         | 5            | 3.93E-02 |
| 1     | GO:0010264 | myo-inositol hexakisphosphate biosynthetic process    | 3            | 3.37E-02 |
| 1     | GO:0016036 | cellular response to phosphate starvation             | 5            | 1.87E-02 |
| 1     | GO:0016126 | sterol biosynthetic process                           | 7            | 4.71E-03 |
| 1     | GO:0016132 | brassinosteroid biosynthetic process                  | 4            | 4.57E-02 |
| 1     | GO:0019375 | galactolipid biosynthetic process                     | 5            | 7.54E-03 |
| 1     | GO:0019745 | pentacyclic triterpenoid biosynthetic process         | 3            | 1.06E-02 |
| 1     | GO:0045454 | cell redox homeostasis                                | 9            | 3.59E-05 |
| 1     | GO:0048653 | anther development                                    | 7            | 6.87E-06 |
| 1     | GO:0051645 | Golgi localization                                    | 3            | 1.21E-02 |
| 1     | GO:0051646 | mitochondrion localization                            | 3            | 1.21E-02 |
| 1     | GO:0055085 | transmembrane transport                               | 15           | 8.51E-04 |
| 1     | GO:0060151 | peroxisome localization                               | 3            | 1.21E-02 |
| 2     | GO:0000041 | transition metal ion transport                        | 11           | 5.21E-08 |
| 2     | GO:0006084 | acetyl-CoA metabolic process                          | 6            | 1.51E-04 |
| 2     | GO:0006633 | fatty acid biosynthetic process                       | 5            | 3.98E-03 |
| 2     | GO:0006826 | iron ion transport                                    | 6            | 1.50E-03 |
| 2     | GO:0006865 | amino acid transport                                  | 4            | 4.78E-02 |
| 2     | GO:0006979 | response to oxidative stress                          | 12           | 1.50E-05 |
| 2     | GO:0007043 | cell-cell junction assembly                           | 5            | 1.00E-10 |
| 2     | GO:0007169 | transmembrane receptor protein tyrosine kinase sign.  | 7            | 4.11E-04 |
| 2     | GO:0007389 | pattern specification process                         | 3            | 1.57E-02 |
| 2     | GO:0008152 | metabolic process                                     | 16           | 2.67E-02 |
| 2     | GO:0008361 | regulation of cell size                               | 3            | 9.11E-03 |
| 2     | GO:0009269 | response to desiccation                               | 3            | 4.55E-03 |
| 2     | GO:0009611 | response to wounding                                  | 10           | 1.92E-03 |
| 2     | GO:0009664 | plant-type cell wall organization                     | 4            | 4.05E-02 |
| 2     | GO:0009739 | response to gibberellin stimulus                      | 5            | 3.06E-03 |
| 2     | GO:0009741 | response to brassinosteroid stimulus                  | 5            | 1.01E-03 |
| 2     | GO:0009750 | response to fructose stimulus                         | 5            | 1.62E-02 |
| 2     | GO:0009805 | coumarin biosynthetic process                         | 4            | 1.84E-03 |
| 2     | GO:0009825 | multidimensional cell growth                          | 3            | 4.15E-02 |
| 2     | GO:0009926 | auxin polar transport                                 | 3            | 2.85E-02 |
| 2     | GO:0009932 | cell tip growth                                       | 4            | 7.52E-03 |
| 2     | GO:0009963 | positive regulation of flavonoid biosynthetic process | 6            | 7.36E-04 |
| 2     | GO:0010015 | root morphogenesis                                    | 3            | 7.54E-03 |
| 2     | GO:0010075 | regulation of meristem growth                         | 7            | 1.20E-03 |
| 2     | GO:0010106 | cellular response to iron ion starvation              | 6            | 1.20E-03 |
| 2     | GO:0010167 | response to nitrate                                   | 10           | 5.37E-05 |
| 2     | GO:0010413 | glucuronoxylan metabolic process                      | 8            | 7.10E-04 |
| 2     | GO:0010817 | regulation of hormone levels                          | 3            | 2.54E-02 |

|   |            |                                      |    |          |
|---|------------|--------------------------------------|----|----------|
| 2 | GO:0015706 | nitrate transport                    | 10 | 8.54E-05 |
| 2 | GO:0016126 | sterol biosynthetic process          | 9  | 7.11E-05 |
| 2 | GO:0016132 | brassinosteroid biosynthetic process | 10 | 4.23E-07 |
| 2 | GO:0030003 | cellular cation homeostasis          | 4  | 1.96E-02 |
| 2 | GO:0040007 | Growth                               | 3  | 1.49E-02 |
| 2 | GO:0042545 | cell wall modification               | 8  | 3.30E-05 |
| 2 | GO:0045492 | xylan biosynthetic process           | 8  | 7.10E-04 |
| 2 | GO:0048765 | root hair cell differentiation       | 5  | 1.62E-02 |
| 2 | GO:0048767 | root hair elongation                 | 6  | 1.13E-02 |
| 2 | GO:0055114 | oxidation-reduction process          | 22 | 7.23E-03 |
| 2 | GO:0070838 | divalent metal ion transport         | 4  | 9.36E-03 |

---
